5. Coté CJ, Zaslavsky A, Downes JJ, Kurth CD, Welborn LG, Warner LO, Malviya SV: Postoperative apnea in former preterm infants after inguinal herniorrhaphy. A combined analysis. *ANESTHESIOLOGY* 1995; 82:809–22
6. Gregory GA, Steward DJ: Life-threatening perioperative apnea in the ex-“premie”. *ANESTHESIOLOGY* 1983; 59: 495–8
7. Welborn LG, Hannallah RS, Luban NL, Fink R, Ruttimann UE: Anemia and postoperative apnea in former preterm infants. *ANESTHESIOLOGY* 1991; 74:1003–6
8. Kurth CD, LeBard SE: Association of postoperative apnea, airway obstruction, and hypoxemia in former premature infants. *ANESTHESIOLOGY* 1991; 75:22–6
9. Malviya S, Swartz J, Lerman J: Are all preterm infants younger than 60 weeks postconceptual age at risk for postanesthetic apnea? *ANESTHESIOLOGY* 1993; 78:1076–81
10. Fisher DM: When is the ex-premature infant no longer at risk for apnea? *ANESTHESIOLOGY* 1995; 82:807–8
11. Welborn LG, Rice LJ, Hannallah RS, Broadman LM, Ruttimann UE, Fink R: Postoperative apnea in former preterm infants: Prospective comparison of spinal and general anesthesia. *ANESTHESIOLOGY* 1990; 72:838–42
12. Krane EJ, Haberkern CM, Jacobson LE: Postoperative apnea, bradycardia, and oxygen desaturation in formerly premature infants: Prospective comparison of spinal and general anesthesia. *Anesth Analg* 1995; 80:7–13

## ANESTHESIOLOGY REFLECTIONS FROM THE WOOD LIBRARY-MUSEUM

### “Between Long and Morton”? C. W. Mayo Opines

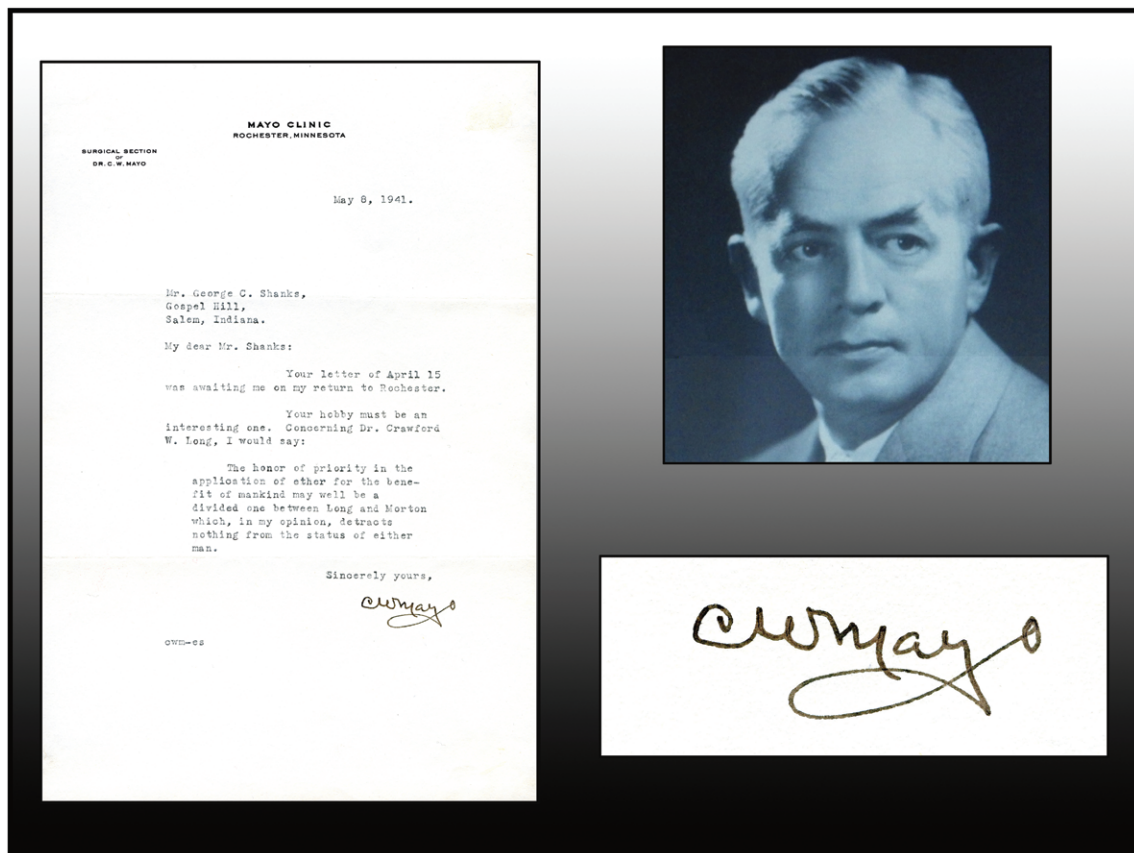

On April 15, 1941, from Salem, Indiana, a Mr. George C. Shanks wrote a letter to Dr. Charles W. “Chuck” Mayo (*upper right*), son of Mayo Clinic cofounder Charles H. “Charlie” Mayo, M.D. Mr. Shanks was requesting Dr. C. W. Mayo’s view on whether Crawford Long or William Morton deserved the credit for pioneering surgical etherization. On May 8, Dr. Mayo signed a typewritten response (*left*) opining that, “The honor of priority in the application of ether for the benefit of mankind may well be a divided one between Long and Morton which, in my opinion, detracts nothing from the status of either man.” (Copyright © the American Society of Anesthesiologists, Inc.)

George S. Bause, M.D., M.P.H., Honorary Curator, ASA’s Wood Library-Museum of Anesthesiology, Schaumburg, Illinois, and Clinical Associate Professor, Case Western Reserve University, Cleveland, Ohio. [UJYC@aol.com](mailto:UJYC@aol.com).
